# Supplementary material
Source: publisher site journal article supplement (https://www.dovepress.com/article/280279)
Supplement: Supplementary file 1 [file get_supplementary_file.php]

|                                                                   | SIRS<br>(diagnostic) | NEWS Points<br>(diagnostic)                                               | PRESEP Points<br>(diagnostic) | SOFA Points<br>(prognostic)                                                                                                  | qSOFA Points<br>(prognostic) | SPEED<br>Points<br>(prognostic) | MEDS Points<br>(prognostic)    | PIRO Points<br>(prognostic)                   |
|-------------------------------------------------------------------|----------------------|---------------------------------------------------------------------------|-------------------------------|------------------------------------------------------------------------------------------------------------------------------|------------------------------|---------------------------------|--------------------------------|-----------------------------------------------|
| Temperature (°C)                                                  | > 38.0 or < 36.0     | 1 = 38.1-39 or 35.1-36<br>2 = ≥ 39.1<br>3 = ≤ 35                          | 1 = < 36.0<br>4 = > 38.0      | —                                                                                                                            | —                            | 3 = < 36.0                      | —                              | —                                             |
| Heart rate<br>(beats/min)                                         | > 90                 | 1 = 41-50 or 91-110<br>2 = 110-130<br>3 = < 40 or ≥ 131                   | 2 = > 90                      | —                                                                                                                            | —                            | —                               | —                              | 2 = > 120                                     |
| Respiration rate<br>(breaths/min)                                 | > 20                 | 1 = 9-11<br>2 = 21-24<br>3 = ≤ 8 or ≥ 25                                  | 1 = > 22                      | —                                                                                                                            | 0 = < 22<br>1 = ≥ 22         | —                               | 3 = > 20                       | 3 = > 20                                      |
| Blood Pressure<br>(mmHg)                                          | —                    | (sBP)<br>1 = 101-110<br>2 = 91-100<br>3 = < 90 or ≥ 220                   | (sBP)<br>2 = < 90             | 1 = MAP < 70<br>2 = DA ≤ 5 or DBA (any dose)<br>3 = DA 5-15 or EPI ≤ 0.1 or NE ≤ 0.1<br>4 = DA > 15 or EPI > 0.1 or NE > 0.1 | (sBP)<br>1 = ≤ 100           | (sBP)<br>3 = < 90               | —                              | (sBP)<br>4 = < 70<br>2 = 70-90                |
| Peripheral oxygen<br>saturation<br>(%)                            | —                    | 1 = 94-95<br>2 = 92-93<br>3 = ≤ 91<br>*supplemental O <sub>2</sub> +2 pts | 2 = < 92                      | —                                                                                                                            | —                            | 2 = < 90                        | 3 = < 90                       | 3 = respiratory<br>failure or<br>hypoxemia    |
| PaO <sub>2</sub> /FIO <sub>2</sub><br>(mmHg)                      | —                    | —                                                                         | —                             | 1 = < 400<br>2 = < 300<br>3 = < 200<br>4 = < 100                                                                             | —                            | —                               | —                              | —                                             |
| WBC (10 <sup>3</sup> cells/mm <sup>3</sup> )                      | > 12 or < 4          | —                                                                         | —                             | —                                                                                                                            | —                            | —                               | —                              | —                                             |
| Band Proportion (%)                                               | > 10                 | —                                                                         | —                             | —                                                                                                                            | —                            | —                               | 3 = > 5                        | 1 = > 5                                       |
| Hematocrit (%)                                                    | —                    | —                                                                         | —                             | —                                                                                                                            | —                            | 2 = < 38                        | —                              | —                                             |
| Platelet count<br>(platelets x 10 <sup>3</sup> /mm <sup>3</sup> ) | —                    | —                                                                         | —                             | 1 = < 150<br>2 = < 100<br>3 = < 50<br>4 = < 20                                                                               | —                            | —                               | 3 = < 150                      | 2 = < 150                                     |
| Lactate (mmol/L)                                                  | —                    | —                                                                         | —                             | —                                                                                                                            | —                            | 2 = > 2.4                       | —                              | 3 = > 4.0                                     |
| pH                                                                | —                    | —                                                                         | —                             | —                                                                                                                            | —                            | 1 = < 7.35                      | —                              | —                                             |
| Bilirubin (mg/dL)                                                 | —                    | —                                                                         | —                             | 1 = 1.2-1.9<br>2 = 2.0-5.9<br>3 = 6.0-11.9<br>4 = > 12.0                                                                     | —                            | —                               | —                              | —                                             |
| BUN (mg/dL)                                                       | —                    | —                                                                         | —                             | —                                                                                                                            | —                            | —                               | —                              | 2 = > 20                                      |
| Creatinine (mg/dL)                                                | —                    | —                                                                         | —                             | 1 = 1.2-1.9<br>2 = 2.0-3.4<br>3 = 3.5-4.9<br>4 = > 5.0                                                                       | —                            | —                               | —                              | —                                             |
| Altered mental status                                             | —                    | 3 = V, P or U                                                             | —                             | (GCS)<br>1 = 13-14<br>2 = 10-12<br>3 = 6-9<br>4 = < 6                                                                        | (GCS)<br>1 = < 15            | —                               | 2 = By history<br>or exam      | —                                             |
| Immunosuppressed                                                  | —                    | —                                                                         | —                             | —                                                                                                                            | —                            | 3 = Yes                         | —                              | —                                             |
| Infection                                                         | —                    | —                                                                         | —                             | —                                                                                                                            | —                            | 2 = pneumonia                   | 2 = lower<br>respiratory tract | 4 = Pneumonia<br>0 = Soft tissue<br>2 = Other |
| COPD                                                              | —                    | —                                                                         | —                             | —                                                                                                                            | —                            | —                               | —                              | 1 = Yes                                       |
| Liver disease                                                     | —                    | —                                                                         | —                             | —                                                                                                                            | —                            | —                               | —                              | 2 = Yes                                       |
| Malignancy                                                        | —                    | —                                                                         | —                             | —                                                                                                                            | —                            | —                               | —                              | 1 = Non-<br>metastatic<br>2 = Metastatic      |
| Terminal illness <sup>a</sup>                                     | —                    | —                                                                         | —                             | —                                                                                                                            | —                            | —                               | 6 = Yes                        | —                                             |
| Nursing Home<br>Resident                                          | —                    | —                                                                         | —                             | —                                                                                                                            | —                            | —                               | 2 = Yes                        | 2 = Yes                                       |
| Age (years)                                                       | —                    | —                                                                         | —                             | —                                                                                                                            | —                            | —                               | 3 = > 65                       | 1 = 65-80<br>2 = > 80                         |
| Septic Shock <sup>b</sup>                                         | —                    | —                                                                         | —                             | —                                                                                                                            | —                            | —                               | 3 = Yes                        | —                                             |

sBP = systolic blood pressure. MAP = mean arterial pressure. DA = dopamine (mcg/kg/min). DBA = dobutamine (mcg/kg/min). EPI = epinephrine (mcg/kg/min). NE = norepinephrine (mcg/kg/min).

<sup>a</sup> Terminal illness = illness with a poor prognosis that would likely result in death within six months of diagnosis – mainly Stage IV cancer or a patient on hospice care

<sup>b</sup> Septic shock ≡ at least 2 SIRS criteria (heart rate > 90, respiratory rate > 20 or PaCO<sub>2</sub> < 32 mmHg, temperature > 100.4°F (38°C) or < 96.8°F (36°C), WBC > 15,000/mm<sup>3</sup> or < 4000/mm<sup>3</sup> or bands > 10%) + organ dysfunction + hypotension (systolic blood pressure < 90) that persists after a bolus of 20 mL/kg

### **Interpretation of Existing Scores:**

**SIRS (diagnostic)** - Inclusion of  $\geq 2$  of the included criteria meets the SIRS definition. WBC and percentage of bands is considered one criterion.

**NEWS (diagnostic)** - Add up points.

- Score:
  - 1-4: prompt assessment by a competent registered nurse who should decide if a change to the frequency of clinical monitoring or an escalation of clinical care is required.
  - 5-6 or a RED score (an extreme variation in a single physiological parameter (i.e., a score of 3 in any one physiological parameter in the NEWS column): prompt an urgent review by a clinician skilled with competencies in the assessment of acute illness.
  - $\geq 7$ : prompt emergency assessment by a clinical team/critical care outreach team with critical-care competencies and usually transfer of the patient to a higher-level care team.

**PRESEP (diagnostic)** - Add up points.

- Score:
  - $\geq 4$ : possible existing septic disease

**SOFA (prognostic)** - Add up points.

- Score:
  - 0-6:  $< 10\%$  mortality
  - 7-9: 15-20% mortality
  - 10-12: 40-50% mortality
  - 13-14: 50-60% mortality
  - 15:  $> 80\%$  mortality
  - $>15$ :  $> 90\%$  mortality

**qSOFA (prognostic)** - Add up points.

- Score:
  - 0-1: not high risk for in-hospital mortality
  - 2-3: high risk for in-hospital mortality (3- to 14-fold increase)

**SPEED (prognostic)** - Add up points.

- Score:
  - $< 3$ : 11.0% mortality
  - 4-6: 29.7% mortality
  - 7-9: 57.2% mortality
  - $> 10$ : 93.8% mortality

**MEDS (prognostic)** - Add up points. If a respiratory rate  $>20$  and a peripheral oxygen saturation  $<90\%$  are both present, only a single score of 3 will be added to the collective total score.

- Score:
  - 0-4: 0.9-1.1% mortality
  - 5-7: 2-4.4% mortality
  - 8-12: 7.8-9.3% mortality
  - 13-15: 16.1-20.2% mortality
  - 16-27: 39-50% mortality

**PIRO (prognostic)** - Add up points. If a patient has pneumonia with another infection, it is scored as 4.

- Score:
  - $< 5$ : 0% mortality
  - 5-9: 1.9% mortality
  - 10-14: 6.5% mortality
  - 15-19: 24% mortality
  - $\geq 20$ : 57% mortality
